# Supplementary material for: Rapid and sensitive determination of doxorubicin in human whole blood by vertically-ordered mesoporous silica film modified electrochemically pretreated glassy carbon electrodes
Source: Royal Society of Chemistry journal article supplement (doi:10.1039/d0ra10000e), 2021-01-01
Supplement: d0ra10000e1.pdf [file d0ra10000e1.pdf]

Supporting Information to

**Rapid and Sensitive Determination of Doxorubicin in  
Human Whole Blood by Vertically-Ordered Mesoporous  
Silica Film Modified Electrochemically Pretreated Glassy  
Carbon Electrodes**

Meifang Wang<sup>‡,a</sup>, Jing Lin<sup>‡,b</sup>, Jiawei Gong<sup>a</sup>, Mingchen Ma<sup>c</sup>, Hongliang Tang<sup>d,\*</sup>,  
Jiyang Liu<sup>a</sup>, Fei Yan<sup>a,\*</sup>

<sup>a</sup> Department of Chemistry, Zhejiang Sci-Tech University, 928 Second Avenue, Xiasha Higher Education Zone, Hangzhou 310018, PR China.

<sup>b</sup> The First Affiliated Hospital of Guangxi University of Chinese Medicine, Nanning 530023, China

<sup>c</sup> Guangxi University of Chinese Medicine, Nanning 530020, China.

<sup>d</sup> Affiliated Fangchenggang Hospital, Guangxi University of Chinese Medicine, Fangchenggang 538001, China.

<sup>‡</sup> The two authors contributed equally.

\* Corresponding author: tanghl2004@gxctmu.edu.cn; feifei19881203@126.com.

**Table of Content**

**S1. Characterizations of the p-GCE**

S1.1 Contact angle

S1.2 XPS

**S2. Characterizations of the VMSF/p-GCE**

S2.1 SEM

S2.2 Electrochemistry

**S3. Study of memory effect**

**S4. Optimized conditions for DOX detection**

S4.1 pH of supporting electrolyte

S4.2 Preconcentration time

**S5. DPVs of DOX in PBS**

**S6. DPVs of DOX in human whole blood**

S6.1 bare GCE

S6.2 p-GCE

S6.3 Comparison of various electrodes for electrochemical detection of DOX

## S1. Characterization of the p-GCE

### S1.1 Contact angle

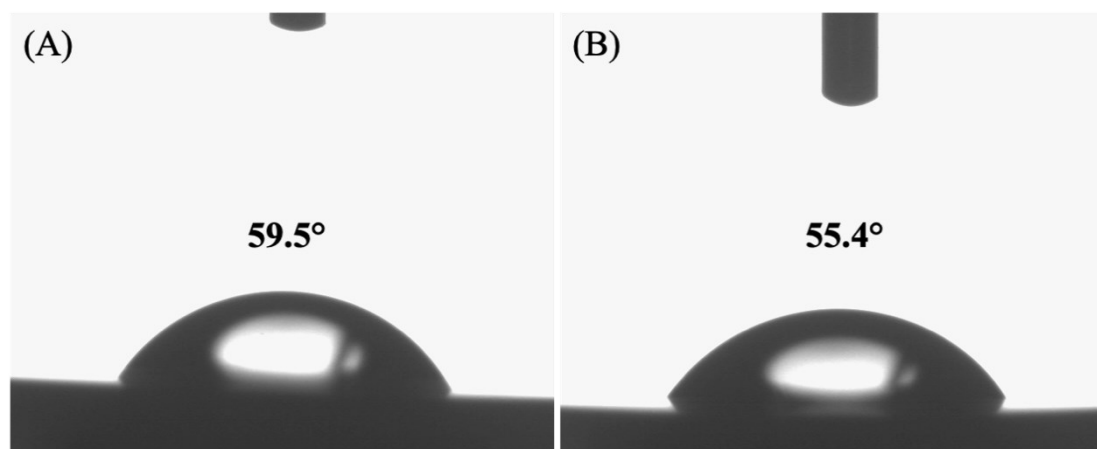

**Figure S1** Contact angle images of the bare p-GCE (A) and VMSF/p-GCE (B).

## S1.2 XPS

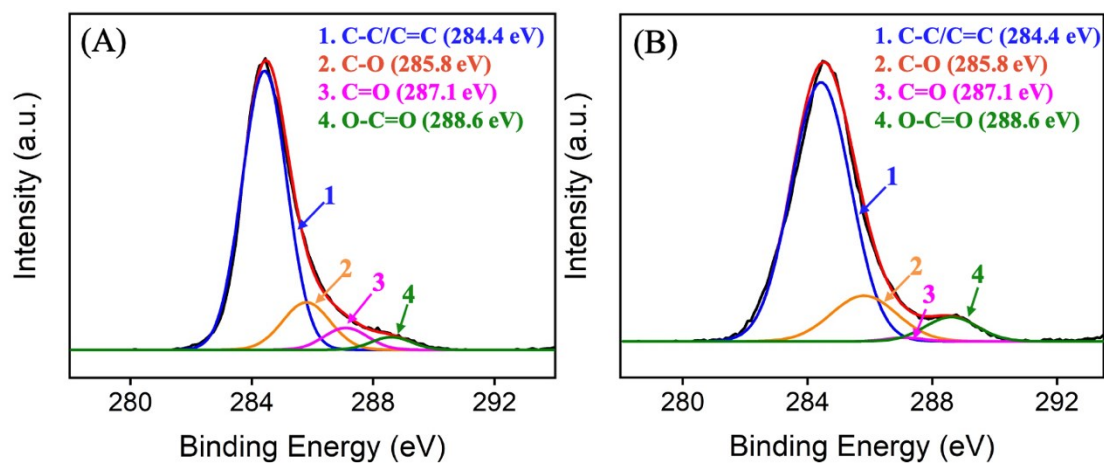

**Figure S2** High-resolution XPS spectra for C1s of GCE (A) and p-GCE (B).

## S2. Characterizations of the VMSF/p-GCE

### S2.1 SEM

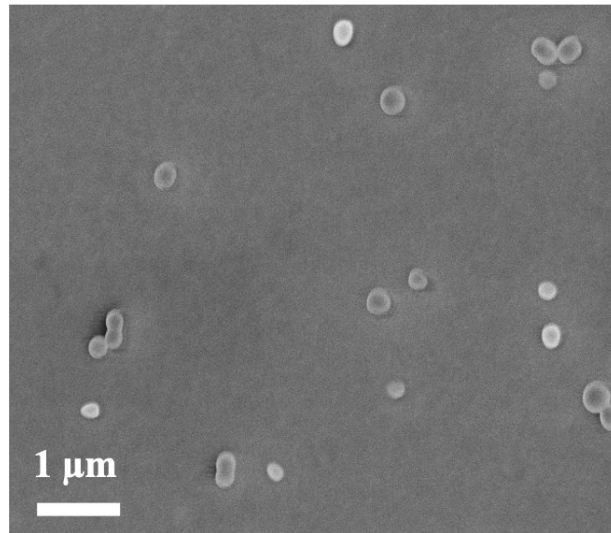

**Figure S3** SEM of the VMSF/p-GCE.

## S2.2 Electrochemistry

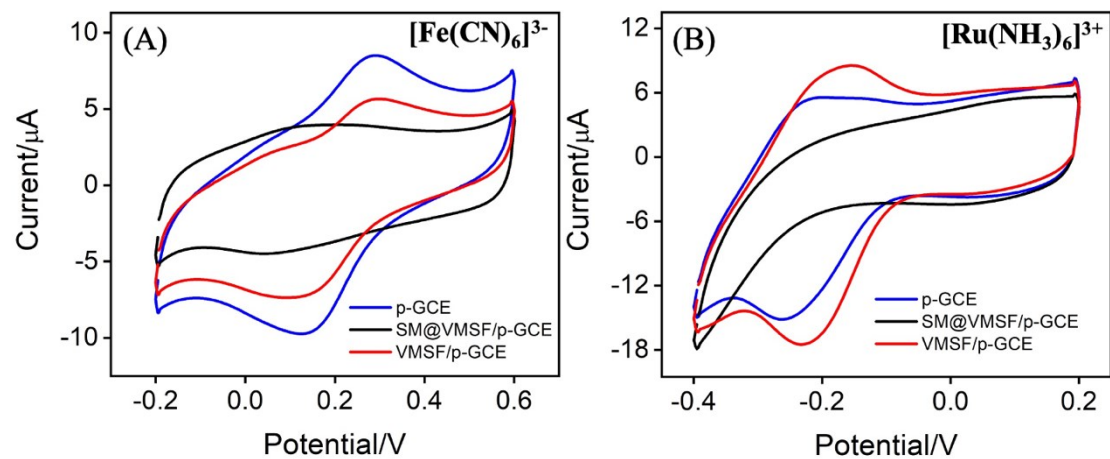

**Figure S4** CV curves obtained from p-GCE, SM@VMSF/p-GCE and VMSF/p-GCE electrodes in (A)  $[\text{Fe}(\text{CN})_6]^{3-}$  and (B)  $[\text{Ru}(\text{NH}_3)_6]^{3+}$  solution. The supporting electrolyte was 0.05 M KHP and the scan rate was 50 mV/s.

### S3. Study of memory effect

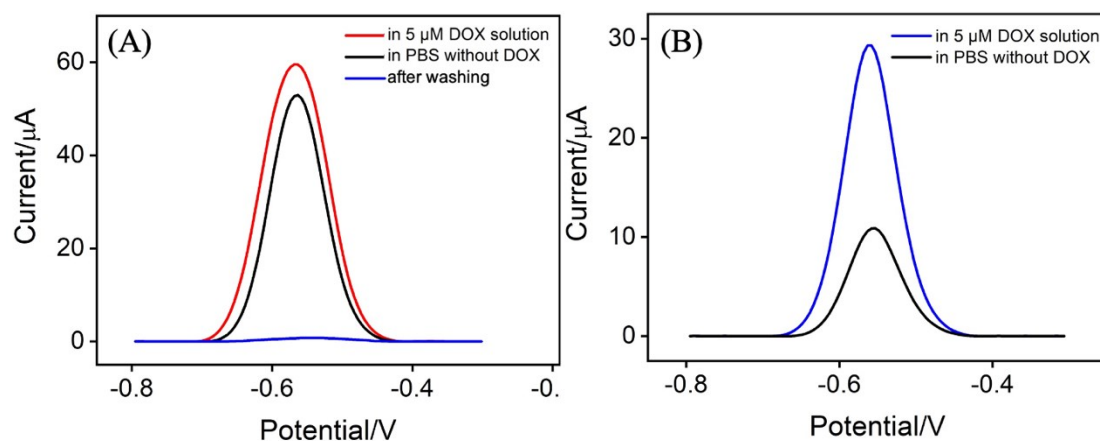

**Figure S5** DPVs of the VMSF/p-GCE (A) and p-GCE (B) in 0.1 M PBS solution (pH 6.0) containing 5  $\mu\text{M}$  DOX and their DPV responses in 0.1 M PBS solution (pH 6.0) after DOX measurement. After washing in (A) means the used VMSF/p-GCE was immersed into 0.1 M HCl-ethanol solution under stirring for 2 min.

## S4. Optimized conditions for DOX detection

### S4.1 pH of supporting electrolyte

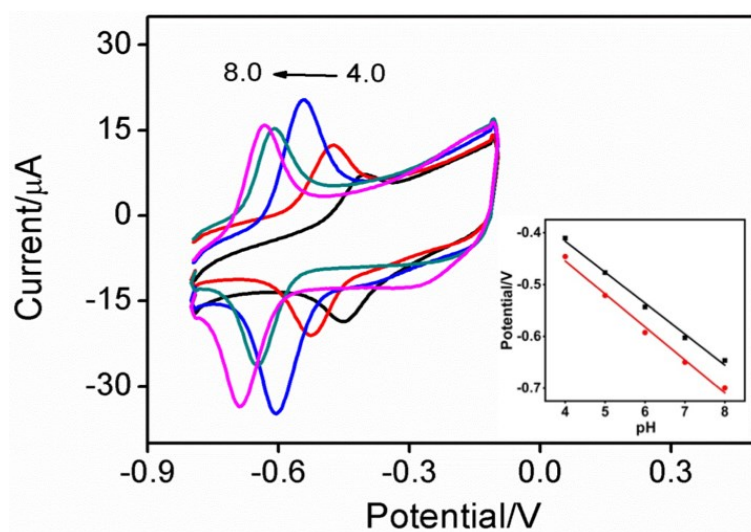

**Figure S6** CVs of the VMSF/p-GCE in 0.1 M PBS solution containing 10 μM DOX at different pH values. Inset shows the dependence of cathodic peak potential ( $E_{pc}$ ) and anodic peak potential ( $E_{pa}$ ) on the pH value.



#### S4.2 Preconcentration time

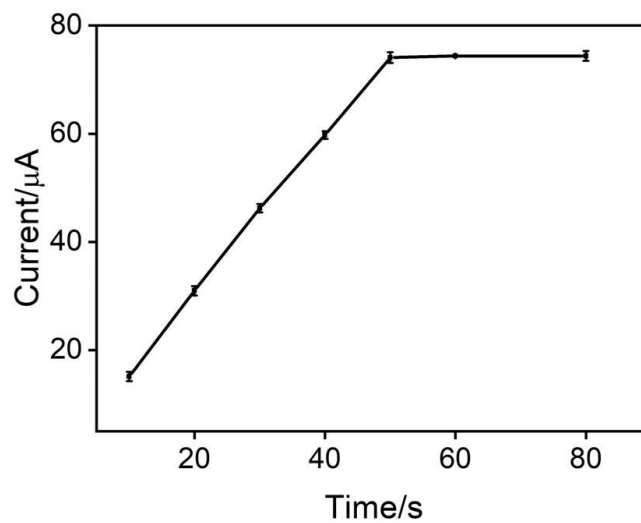

**Figure S7** Influence of the stirring time on the current response in 0.1 M PBS solution (pH 6.0) containing 10  $\mu$ M DOX. The error bars represent the standard deviation of three measurements.

### S5. DPVs of DOX in PBS

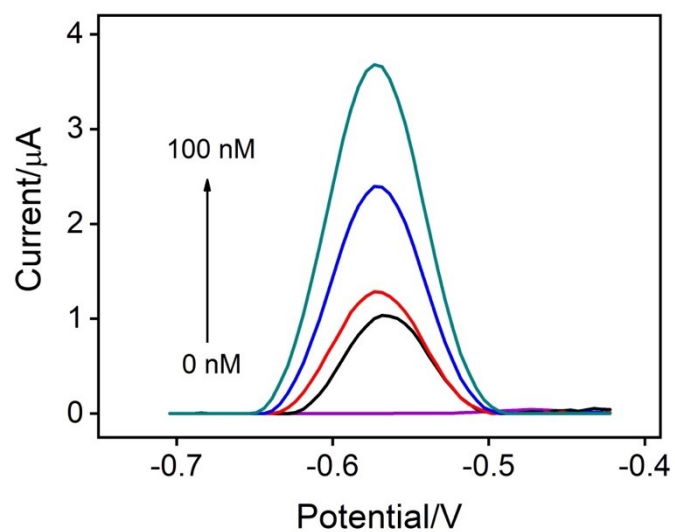

**Figure S8** DPV curves of VMSEF/p-GCE in 0.1 M PBS solution (pH 6.0) containing DOX ranging from 0 nM to 100 nM. The concentration of DOX were 0 nM, 0.5 nM, 10 nM, 50 nM and 100 nM.

## S6. DPVs of DOX in human whole blood

### S6.1 bare GCE

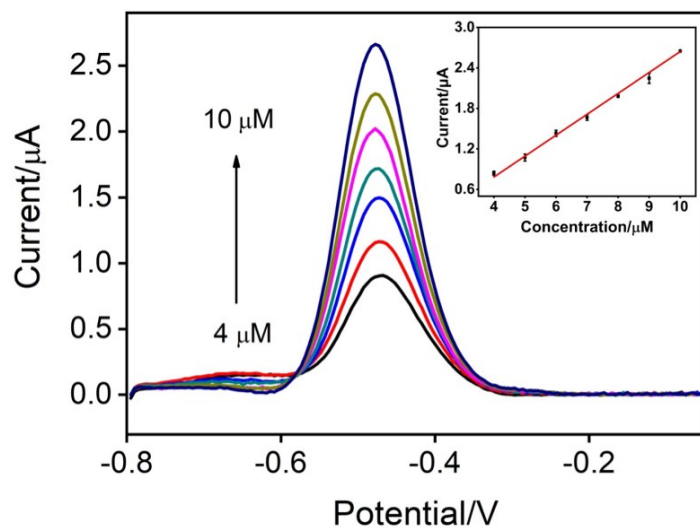

**Figure S9** DPV curves of bare GCE in 50-times diluted human whole blood sample containing various concentrations of DOX ranging from 4  $\mu\text{M}$  to 10  $\mu\text{M}$ . The inset is the calibration curve and the error bars represent the standard deviation of three measurements.

## S6.2 p-GCE

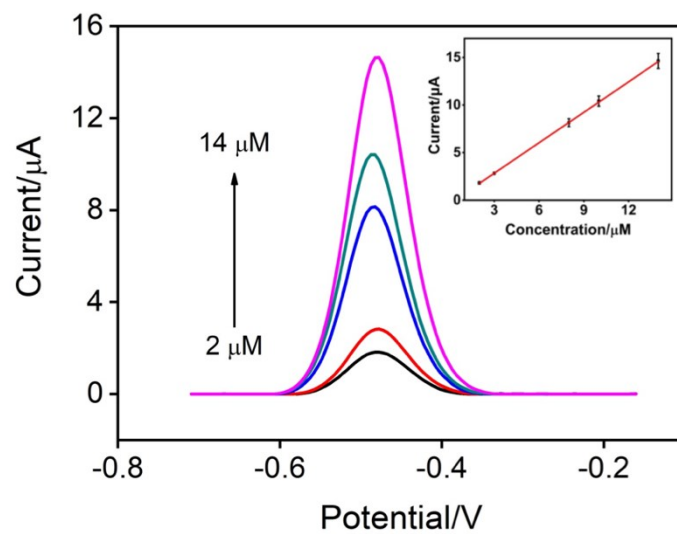

**Figure S10** DPV curves of p-GCE in 50-times diluted human whole blood sample containing various concentrations of DOX ranging from 2  $\mu\text{M}$  to 14  $\mu\text{M}$ . The inset is the calibration curve and the error bars represent the standard deviation of three measurements.

### S6.3 Comparison of various electrodes for electrochemical detection of DOX

**Table S1.** Comparison of various electrodes for electrochemical detection of DOX in human whole blood.

| <b>Electrode</b> | <b>Range<br/>(<math>\mu\text{M}</math>)</b> | <b>Sensitivity<br/>(<math>\mu\text{A}/\mu\text{M}</math>)</b> | <b>LOD<br/>(nM)</b> | <b>R</b> |
|------------------|---------------------------------------------|---------------------------------------------------------------|---------------------|----------|
| VMSF/p-GCE       | 0.0005–2                                    | 20.32                                                         | 0.3                 | 0.9910   |
|                  | 2–20                                        | 2.696                                                         |                     | 0.9996   |
| p-GCE            | 2–14                                        | 1.067                                                         | 400                 | 0.9994   |
| bare GCE         | 4–10                                        | 0.3097                                                        | 500                 | 0.9973   |
